# Supplementary material for: Graphene Oxide Nanosheets Interact and Interfere with SARS‐CoV‐2 Surface Proteins and Cell Receptors to Inhibit Infectivity
Source: PubMed Central journal article supplement (PMC8236978; doi:10.1002/smll.202101483), 2021-05-14
Supplement: SMLL-17-2101483-s001.pdf [file SMLL-17-2101483-s001.pdf]

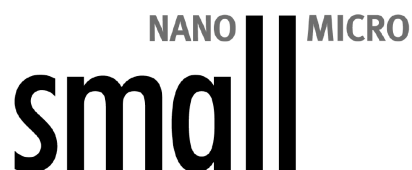

## Supporting Information

for *Small*, DOI: 10.1002/smll.202101483

Graphene Oxide Nanosheets Interact and Interfere with SARS-CoV-2 Surface Proteins and Cell Receptors to Inhibit Infectivity

*Mehmet Altay Unal, Fatma Bayrakdar, Hasan Nazir, Omur Besbinar, Cansu Gurcan, Neus Lozano, Luis M. Arellano, Süleyman Yalcin, Oguzhan Panatli, Dogantan Celik, Damla Alkaya, Aydan Agan, Laura Fusco, Serap Suzuk Yildiz, Lucia Gemma Delogu, Kamil Can Akcali, Kostas Kostarelos,\* and Açelya Yilmazer\**

# Supplementary Information

Graphene oxide nanosheets interact and interfere with SARS-CoV-2 surface proteins and cell receptors to inhibit infectivity

Mehmet Altay Unal<sup>#</sup>, Fatma Bayrakdar<sup>#</sup>, Hasan Nazir, Omur Besbinar, Cansu Gurcan, Neus Lozano, Luis M. Arellano, Süleyman Yalcin, Oguzhan Panatli, Dogantan Celik, Damla Alkaya, Aydan Agan, Laura Fusco, Serap Suzuk Yildiz, Lucia Gemma Delogu, Kamil Can Akcali, Kostas Kostarelos<sup>\*</sup>, Açelya Yilmazer<sup>\*</sup>

**Table S1.** Grid box mapping parameters of proteins used in Autodock-Vina\*.

|                   | <b>6M0J</b> | <b>1R42</b> | <b>6VXX</b> | <b>6VYB</b> |
|-------------------|-------------|-------------|-------------|-------------|
| Center (Å)        |             |             |             |             |
| x                 | -24.7020    | 58.0255     | 222.6740    | 218.406     |
| y                 | 18.5065     | 59.8315     | 209.4370    | 212.116     |
| z                 | -7.2405     | 26.2695     | 195.4800    | 201.544     |
| Box dimension (Å) |             |             |             |             |
| x                 | 55.354      | 73.341      | 110.888     | 107.874     |
| y                 | 67.701      | 61.091      | 121.915     | 113.728     |
| z                 | 110.897     | 58.989      | 155.792     | 168.452     |

\*other parameters: energy\_range = 3, exhaustiveness = 8, num\_modes = 9

**Table S2.** Details of bonding interactions of GO and 6M0J (Figure 2b, 1st position).

| Donor-Acceptor        | Distance,<br>Å | Category      | Types*   | Angle,<br>DHA* | Angle,<br>HAY(Z,E)* |
|-----------------------|----------------|---------------|----------|----------------|---------------------|
| GLY381:HN - GO:O108   | 2.930          | H-bond        | HB       | 131.012        | 124.431             |
| GLN414:HE21 - GO:O301 | 2.414          | H-bond        | HB       | 120.328        | 96.332              |
| GLN414:HE21 - GO:O468 | 2.383          | H-bond        | HB       | 103.382        | 112.085             |
| GLN414:HE22 - GO:O468 | 2.587          | H-bond        | HB       | 91.048         | 106.153             |
| GO:H100 - CYS379:O    | 2.424          | H-bond        | HB       | 106.036        | 140.75              |
| GO:H289 - GLY413:O    | 1.686          | H-bond        | HB       | 147.166        | 137.477             |
| GO:H440 - ASP427:OD2  | 2.637          | H-bond        | HB       | 154.080        | 126.233             |
| GO:H506 - TYR369:OH   | 2.283          | H-bond        | HB       | 115.752        | 108.316             |
| GO:H491 - PRO412:O    | 2.874          | H-bond        | HB       | 101.492        | 153.913             |
| TYR380:CA -GO:O111    | 3.164          | H-bond        | CH       |                |                     |
| GLY413:CA - GO:O296   | 3.458          | H-bond        | CH       |                |                     |
| GO:H456 - GLY381:O    | 2.599          | H-bond        | CH       |                |                     |
| ASP427:OD2 – GO       | 4.016          | Electrostatic | Pi-Anion |                |                     |
| LYS378 – GO           | 4.865          | Hydrophobic   | Alkyl    |                |                     |
| GO - LYS378           | 5.254          | Hydrophobic   | Pi-Alkyl |                |                     |

\*HB=conventional, CH=Carbon-Hydrogen; DHAY(Z,E)=donor-hydrogen-acceptor-any atom

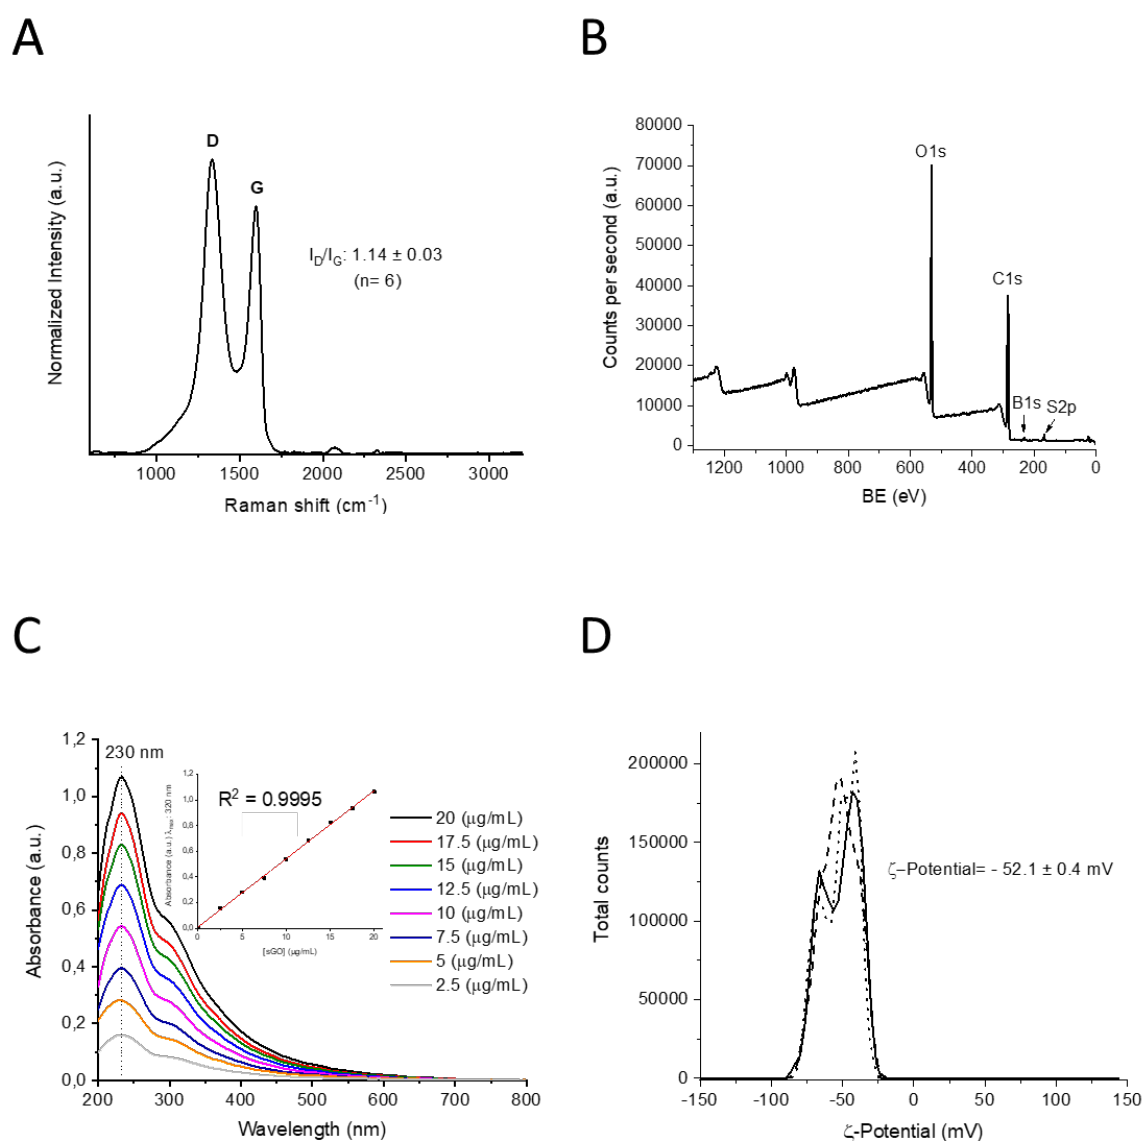

**Figure S1.** Additional characterization of GO material. (A) Normalized Raman spectrum as an average of 6 individual spectra. (B) XPS survey analysis. (C) UV-vis spectra ranged from 2.5 up to 20  $\mu\text{g/mL}$  with calibration data at the wavelength of 230 nm. (D)  $\zeta$ -Potential measurements.

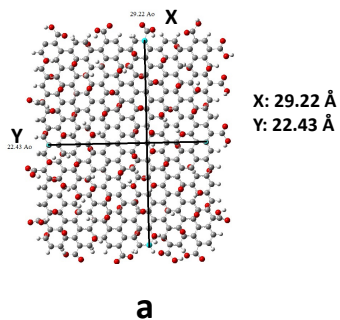

GO-6M0J docking results of 2nd position

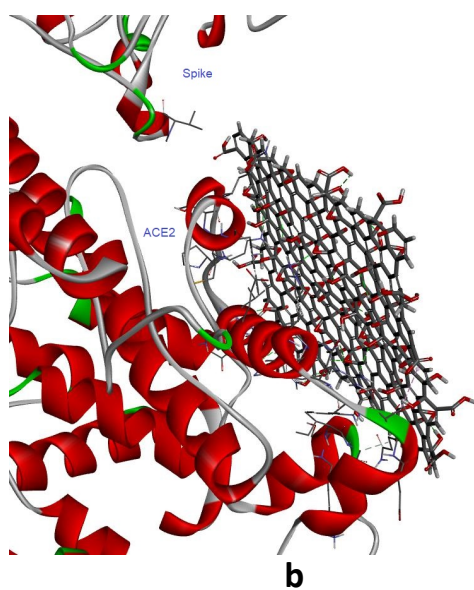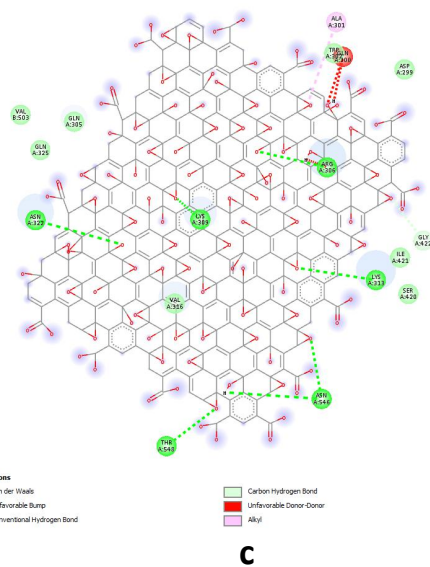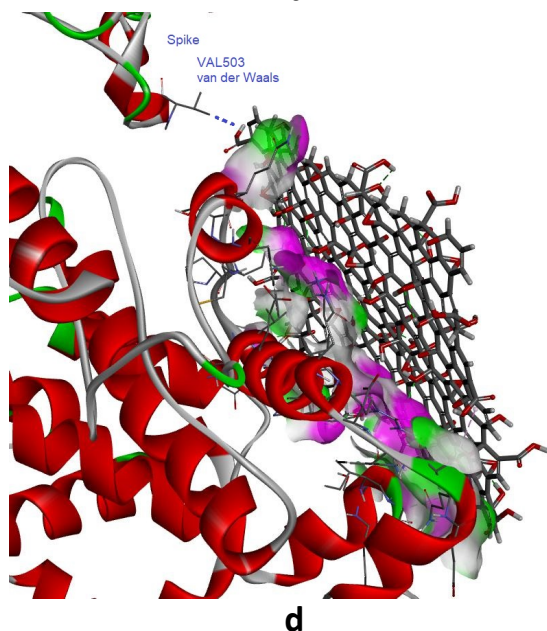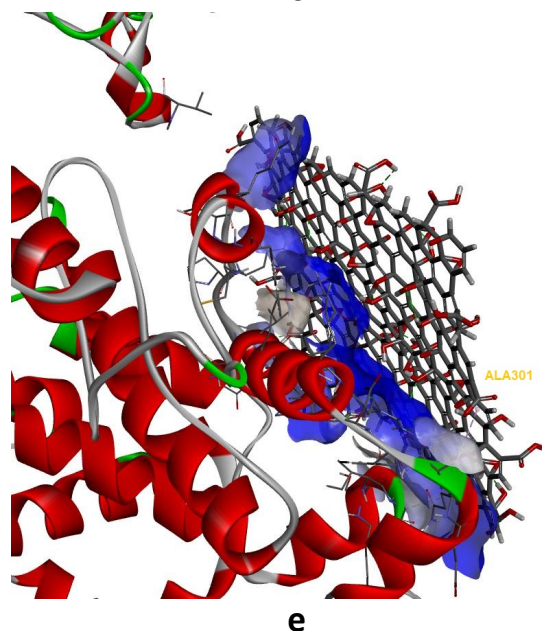

**Figure S2.** (a) dimension of GO used in this study; (b) GO-6M0J docking result, binding affinity  $-8.8 \text{ kcal/mol}$ ; (c) 2D map of 6M0J amino acids bonding interactions with GO (2nd). Spike residues: VAL503 ACE2 residues: AS546, THR548, GLY422, ASN322, LYS313, LYS309, ARG306, ALA301, GLN300; (d) H-bonding: pink shows donors and green shows acceptors; (e) Hydrophobicity (alkyl) interaction, ALA301.

**Table S3.** Details of bonding interactions of GO and 6M0J (Figure S1b, 2nd position).

| Donor-Acceptor        | Distance,<br>Å | Category    | Types* | Angle,<br>DHA* | Angle,<br>HAY(Z,E)* |
|-----------------------|----------------|-------------|--------|----------------|---------------------|
| ARG306:HH11 - GO:O471 | 2.412          | H-bond      | HB     | 112.74         | 101.987             |
| LYS309:HZ2 - GO:O303  | 1.769          | H-bond      | HB     | 160.753        | 143.437             |
| LYS313:HZ2 - GO:O113  | 3.020          | H-bond      | HB     | 105.223        | 116.218             |
| LYS313:HZ3 - GO:O113  | 2.980          | H-bond      | HB     | 107.848        | 98.802              |
| ASN322:HD21 - GO:O465 | 2.371          | H-bond      | HB     | 111.575        | 101.473             |
| ASN546:HD21 - GO:O198 | 2.126          | H-bond      | HB     | 108.631        | 134.523             |
| THR548:HG1 - GO:O205  | 3.094          | H-bond      | HB     | 120.697        | 104.946             |
| GO:H193 - ASN546:O    | 3.049          | H-bond      | HB     | 119.992        | 119.231             |
| GO:H450 - GO:O309     | 1.747          | H-bond      | HB     | 147.72         | 94.397              |
| GLY422:CA - GO:O106   | 3.7485         | H-bond      | CB     |                |                     |
| ALA301 - GO           | 4.72136        | Hydrophobic | Alkyl  |                |                     |

\*HB=conventional, CH=Carbon-Hydrogen; DHAY(Z,E)=donor-hydrogen-acceptor-any atom

GO-6M0J docking results of 4th position

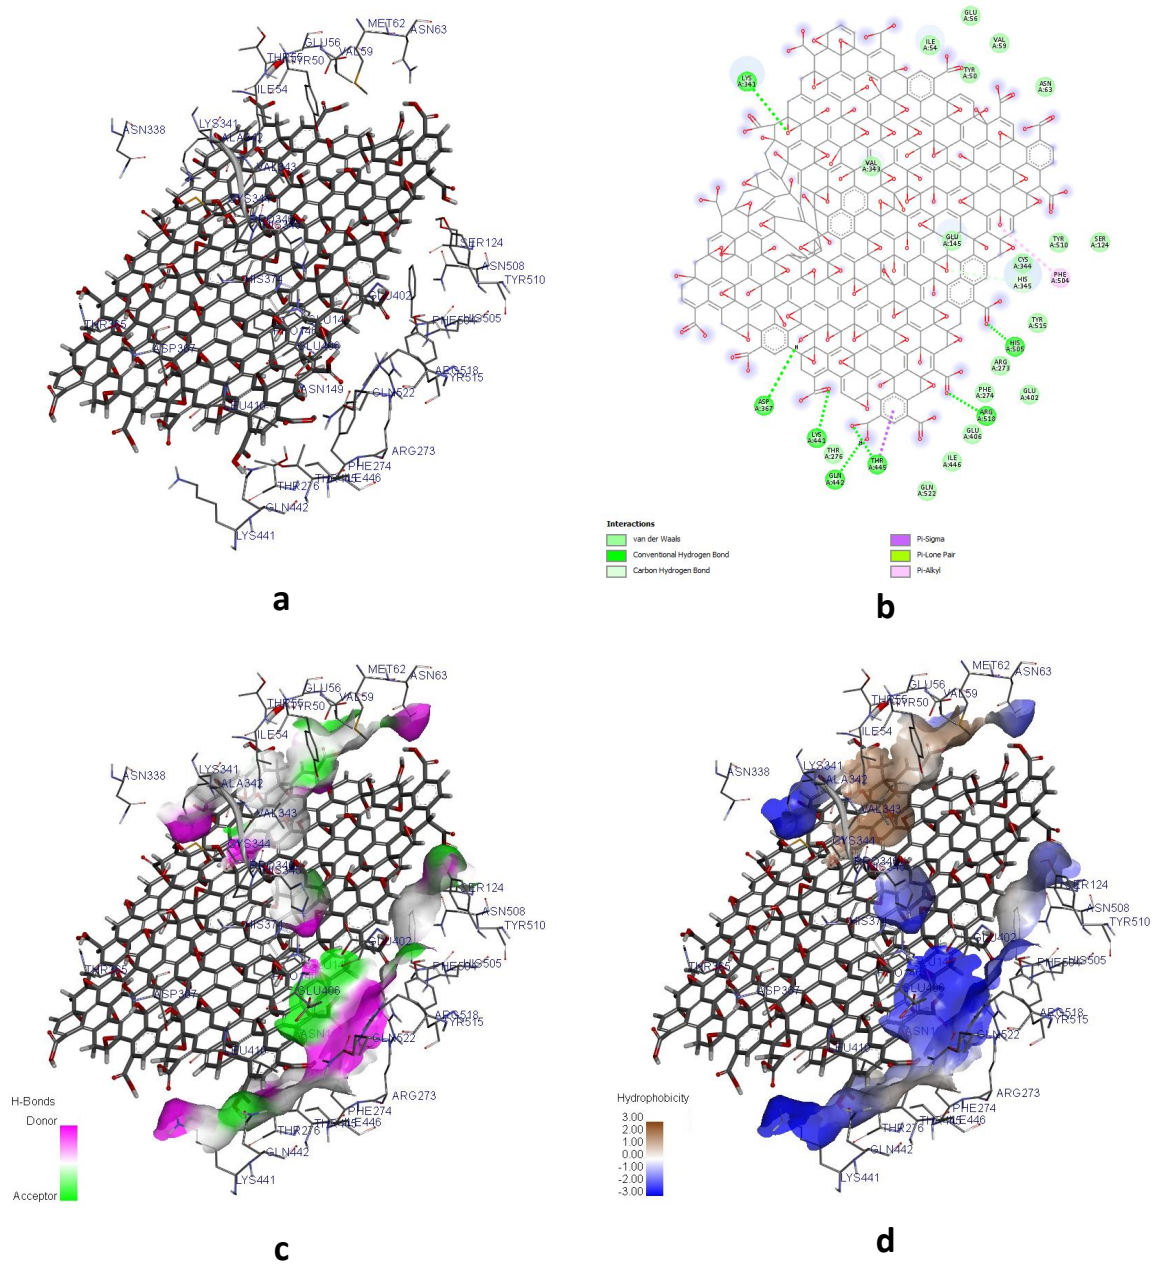



**Table S4.** Details of bonding interactions of GO and 6M0J (Figure S2b, 4th position).

| Donor-Acceptor        | Distance,<br>Å | Category    | Types*       | Angle,<br>DHA* | Angle,<br>HAY(Z,E)* |
|-----------------------|----------------|-------------|--------------|----------------|---------------------|
| LYS341:HZ1 - GO:O263  | 2.548          | H-bond      | HB           | 126.937        | 98.278              |
| LYS441:HZ1 - GO:O459  | 2.649          | H-bond      | HB           | 95.081         | 155.303             |
| LYS441:HZ3 - GO:O459  | 2.311          | H-bond      | HB           | 117.661        | 122.436             |
| THR445:HG1 - GO:O471  | 1.7915         | H-bond      | HB           | 157.091        | 124.165             |
| HIS505:HE2 - GO:O455  | 1.769          | H-bond      | HB           | 139.265        | 131.891             |
| ARG518:HH12 - GO:O487 | 2.468          | H-bond      | HB           | 131.386        | 112.018             |
| HIS345:CD2 - GO:O97   | 2.531          | H-bond      | HB           |                |                     |
| THR445:CG2 - GO       | 3.671          | Hydrophobic | Pi-Sigma     |                |                     |
| GO:O97 - A:HIS345     | 2.974          | Other       | Pi-Lone Pair |                |                     |
| PHE504 - GO           | 5.213          | Hydrophobic | Pi-Alkyl     |                |                     |

\*HB=conventional, CH=Carbon-Hydrogen; DHAY(Z,E)=donor-hydrogen-acceptor-any atom

**Table S5.** Binding Affinity ( $\Delta G$  kcal/mol) of 6VYB and 6VXX.

| Mode | 6VYB (open state)                   |                               | 6VXX (close state)                  |                               |
|------|-------------------------------------|-------------------------------|-------------------------------------|-------------------------------|
|      | Affinity,<br>( $\Delta G$ kcal/mol) | dist. from best mode<br>RMSD* | Affinity,<br>( $\Delta G$ kcal/mol) | dist. from best mode<br>RMSD* |
| 1    | -10.5                               | 0.000, 0.000                  | -9.0                                | 0.000, 0.000                  |
| 2    | -10.4                               | 60.270, 73.615                | -9.0                                | 34.205, 43.802                |
| 3    | -9.9                                | 2.068, 17.335                 | -8.8                                | 61.234, 80.131                |
| 4    | -9.9                                | 1.863, 17.051                 | -8.7                                | 3.201, 14.741                 |
| 5    | -9.8                                | 1.878, 17.271                 | -8.6                                | 1.585, 4.605                  |
| 6    | -9.7                                | 47.502, 56.632                | -8.5                                | 61.001, 81.189                |
| 7    | -9.7                                | 45.872, 55.156                | -8.4                                | 56.654, 72.844                |
| 8    | -9.5                                | 48.514, 57.649                | -8.4                                | 62.494, 80.007                |
| 9    | -9.4                                | 45.866, 50.776                | -8.3                                | 39.466, 51.913                |

\* rmsd/unbonding, rmsd/ligandbonding

6VYB SARS-CoV-2 spike glycoprotein (open state)

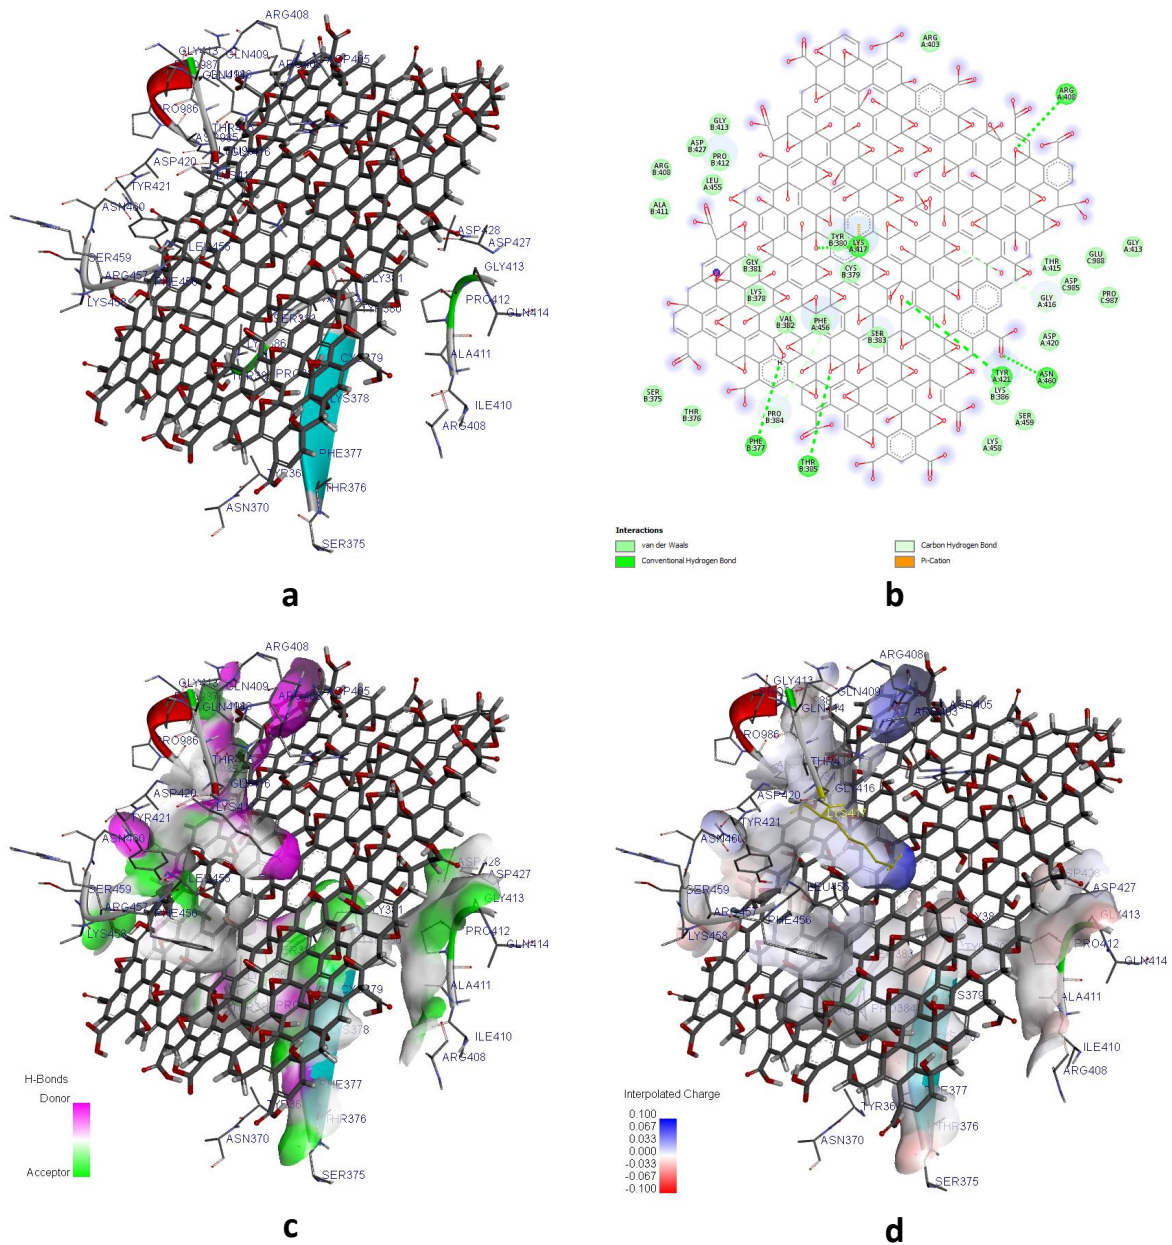

**Figure S4.** 2nd position of GO (a) binding with 6VYB; (b) 2D map of binding; (c) H-bonds; (d) charge interaction, A:LSY417.

**Table S6.** Bonding interactions of 2nd position GO with 6VYB

| Donor-Acceptor          | Distance,<br>Å | Category                | Types*                      | Angle,<br>DHA* | Angle,<br>HAY(Z,E)* |
|-------------------------|----------------|-------------------------|-----------------------------|----------------|---------------------|
| A:ARG408:HH21 - GO:O107 | 3.056          | H-bond                  | HB                          | 114.852        | 94.745              |
| A:LYS417:HZ1 - GO:O8    | 2.812          | H-bond                  | HB                          | 134.62         | 105.288             |
| A:TYR421:HH - GO:O473   | 3.015          | H-bond                  | HB                          | 123.129        | 91.449              |
| A:ASN460:HD22 - GO:O445 | 2.645          | H-bond                  | HB                          | 123.379        | 123.395             |
| B:THR385:HN - GO:O196   | 3.061          | H-bond                  | HB                          | 116.387        | 132.32              |
| GO:H1 - B:PHE377:O      | 3.055          | H-bond                  | HB                          | 95.138         | 152.999             |
| A:GLY416:CA - GO:O115   | 3.091          | H-bond                  | HB                          |                |                     |
| A:LYS417:CE - GO:O109   | 3.281          | H-bond                  | HB                          |                |                     |
| B:PRO384:CD - GO:O7     | 3.119          | H-bond                  | HB                          |                |                     |
| A:LYS417:NZ - GO        | 3.545          | Electrostatic           | Pi-Cation                   |                |                     |
| A:LYS417:HZ1 - GO       | 2.653          | H-bond<br>Electrostatic | Pi-Cation<br>Pi-Donor<br>HB |                |                     |

\*HB=conventional, CH=Carbon-Hydrogen; DHAY(Z,E)=donor-hydrogen-acceptor-any atom

6VXX SARS-CoV-2 spike glycoprotein (close state)  
4th position of GO

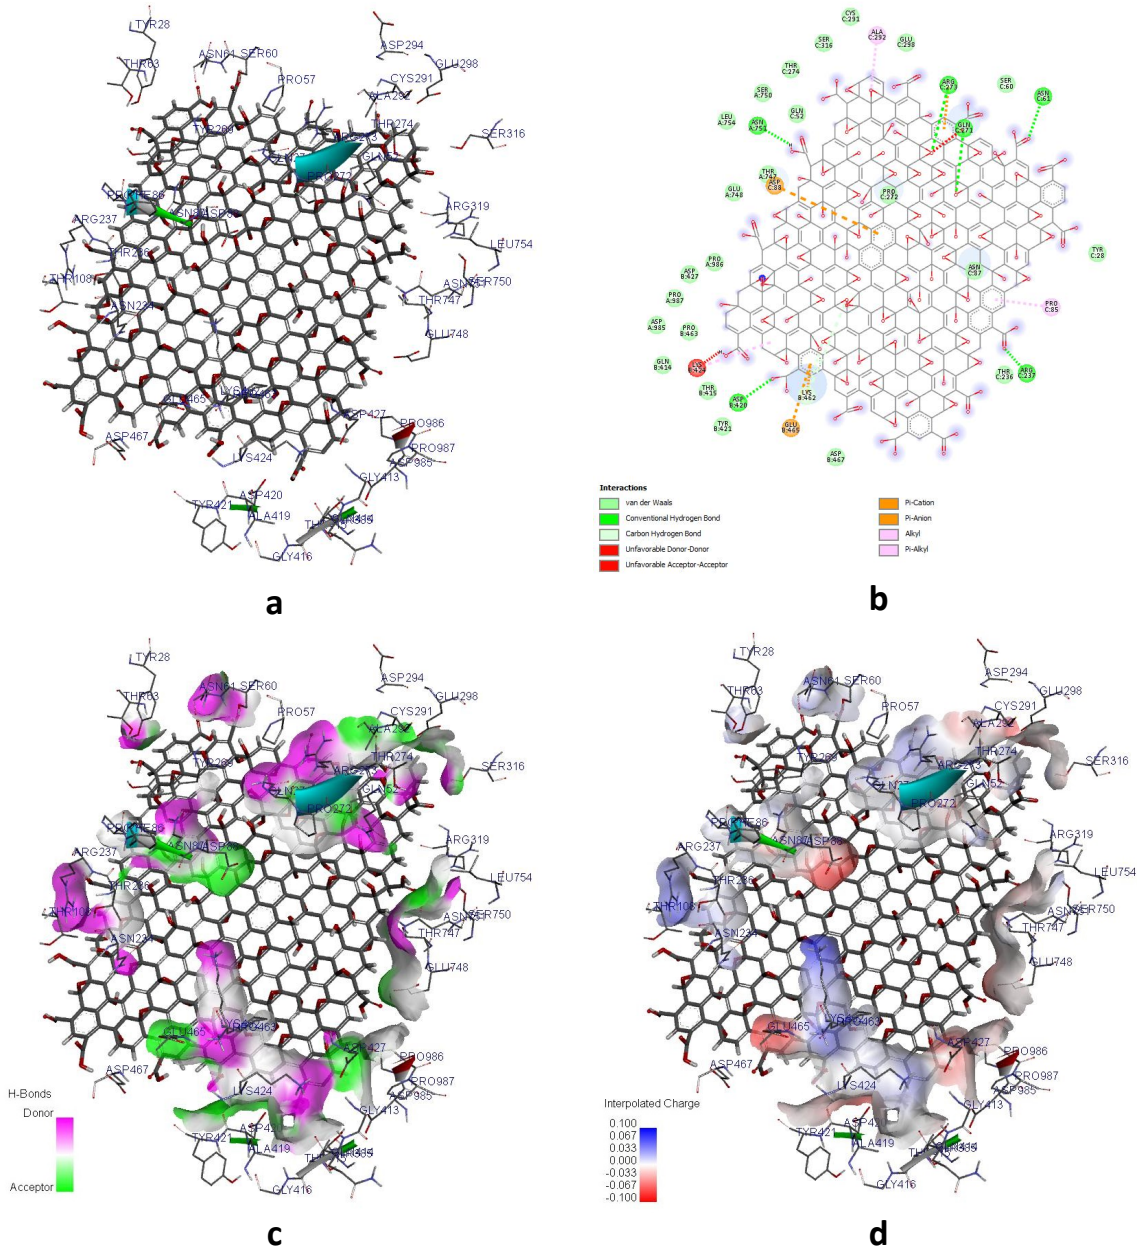

**Figure S5.** 4th position of GO (a) binding with 6VXX; (b) 2D map of binding; (c) H-bonds; (d) charge interaction, B:LYS462, C:ARG273, B:GLU465, C:ASP88.

Continue on next page

7th position of GO

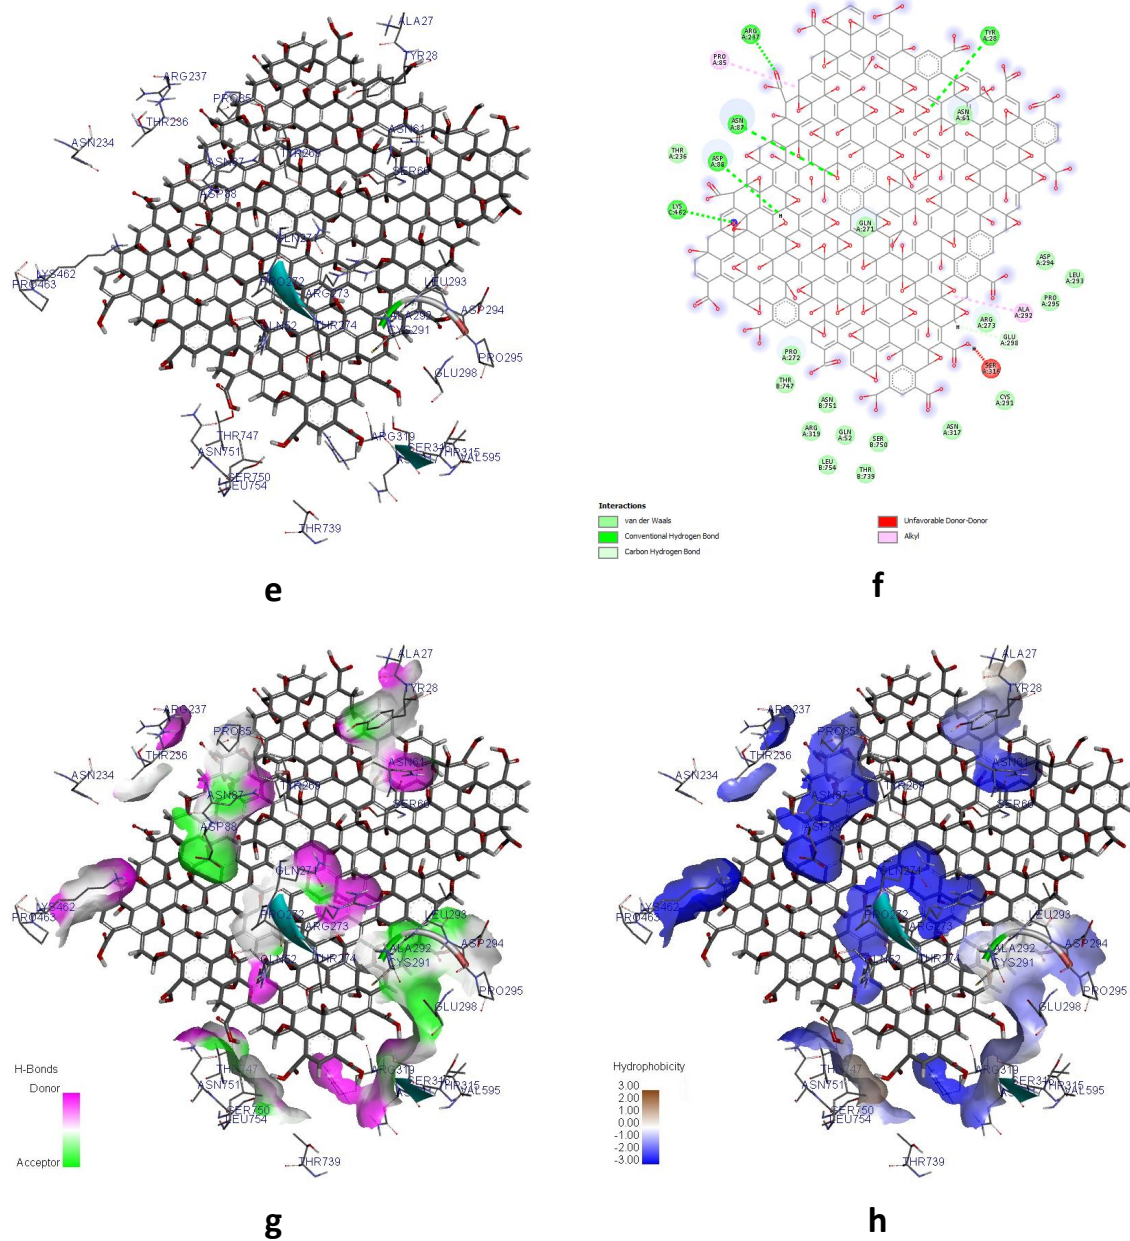

**Figure S5 (cont).** 7th position of GO (**e**) binding with 6VXX; (**f**) 2D map of binding; (**g**) H-bonds; (**h**) hydrophobic interaction, A:ALA292, A:PRO85.

**Table S7.** Bonding interactions of GO with 6VXX

| Donor-Acceptor            | Distance,<br>Å | Category      | Types*    | Angle,<br>DHA* | Angle,<br>HAY(Z,E)* |
|---------------------------|----------------|---------------|-----------|----------------|---------------------|
| <b>4th position of GO</b> |                |               |           |                |                     |
| C:ASN61:HN - GO:O483      | 2.747          | H-bond        | HB        | 145.734        | 170.392             |
| C:ARG237:HE - GO:O455     | 2.623          | H-bond        | HB        | 136.982        | 158.721             |
| C:ARG237:HH22 - GO:O455   | 2.145          | H-bond        | HB        | 150.705        | 104.761             |
| C:GLN271:HE21 - GO:O100   | 2.280          | H-bond        | HB        | 99.885         | 103.778             |
| C:ARG273:HE - GO:O267     | 2.734          | H-bond        | HB        | 125.967        | 142.253             |
| C:ARG273:HH22 - GO:O267   | 2.438          | H-bond        | HB        | 129.505        | 123.98              |
| GO:O435 - B:ASP420:O      | 2.659          | H-bond        | HB        | 98.720         | 170.474             |
| GO:H465 - A:ASN751:OD1    | 2.216          | H-bond        | HB        | 153.161        | 140.345             |
| B:LYS462:CE - GO:O2       | 2.895          | H-bond        | HB        |                |                     |
| B:LYS462:CE - GO:O4       | 3.326          | H-bond        | HB        |                |                     |
| B:LYS462:N - GO           | 3.643          | Electrostatic | Pi-Cation |                |                     |
| C:ARG273:NH2 - GO         | 3.752          | Electrostatic | Pi-Cation |                |                     |
| B:GLU465:OE2 - GO         | 4.430          | Electrostatic | Pi-Anion  |                |                     |
| C:ASP88:OD2 - GO          | 4.396          | Electrostatic | Pi-Anion  |                |                     |
| B:LYS424 - GO             | 5.444          | Hydrophobic   | Alkyl     |                |                     |
| C:ALA292 - GO             | 3.989          | Hydrophobic   | Alkyl     |                |                     |
| GO - B:LYS462             | 5.358          | Hydrophobic   | Pi-Alkyl  |                |                     |
| GO - C:PRO85              | 5.004          | Hydrophobic   | Pi-Alkyl  |                |                     |
| <b>7th position of GO</b> |                |               |           |                |                     |
| A:TYR28:HH - GO:O265      | 2.928          | H-bond        | HB        | 104.396        | 106.353             |
| A:ASN87:HD22 - GO:O268    | 2.901          | H-bond        | HB        | 97.348         | 132.347             |
| A:ARG237:HH22 - GO:O463   | 2.558          | H-bond        | HB        | 148.367        | 157.271             |
| C:LYS462:HZ1 - GO:O1      | 2.045          | H-bond        | HB        | 155.517        | 138.928             |
| GO:H493 - A:ASP88:OD1     | 2.202          | H-bond        | HB        | 111.609        | 102.187             |
| GO:H379 - A:GLU298:OE2    | 2.512          | H-bond        | HB        | 169.006        | 142.973             |
| A:ALA292 - GO             | 4.008          | Hydrophobic   | Alkyl     |                |                     |
| GO - A:PRO85              | 5.185          | Hydrophobic   | Alkyl     |                |                     |

\*HB=conventional, CH=Carbon-Hydrogen; DHAY(X,Z,E)=donor-hydrogen-acceptor-any atom

GO binding to ACE2

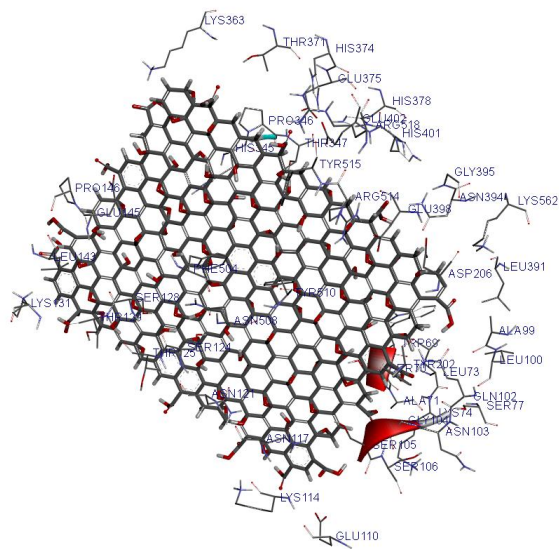

a

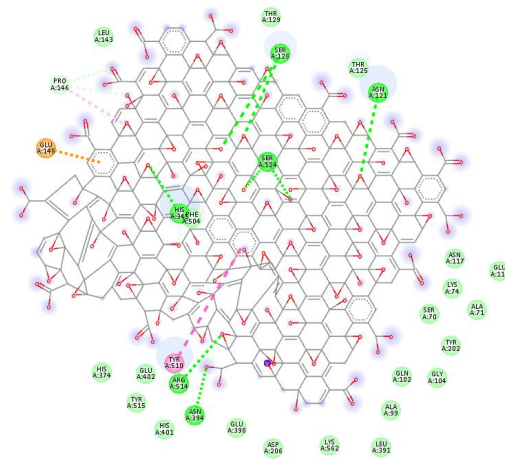

Interactions

- van der Waals
- Conventional Hydrogen Bond
- Carbon Hydrogen Bond
- Pi-Anion
- Pi-Pi T-shaped
- Alkyl

b

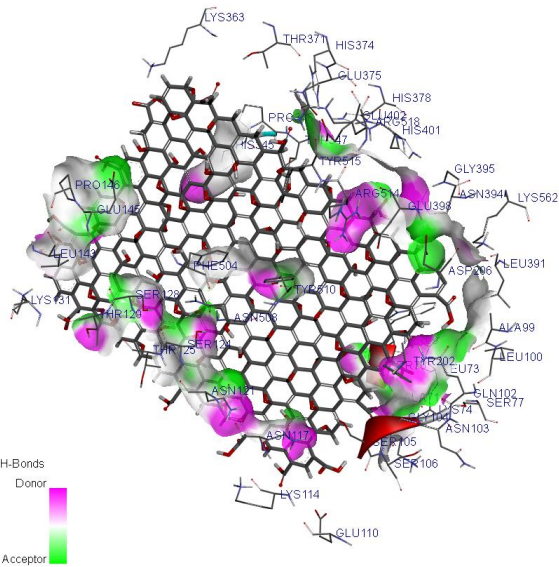

- H-Bonds
- Donor
  - Acceptor

c

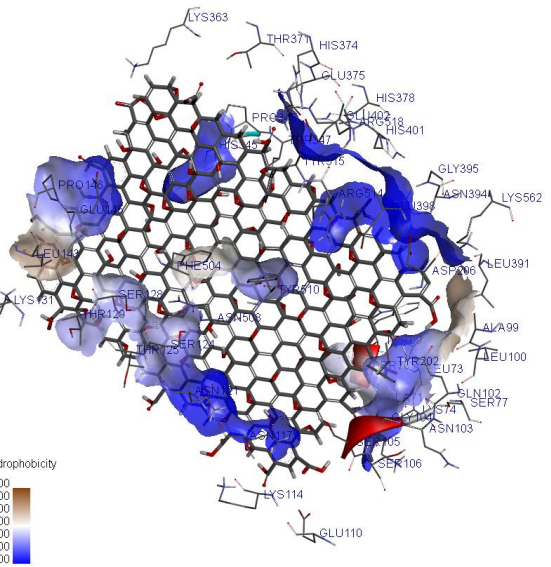

- Hydrophobicity
- 3.00
  - 2.00
  - 1.00
  - 0.00
  - 1.00
  - 2.00
  - 3.00

d

Continue on next page



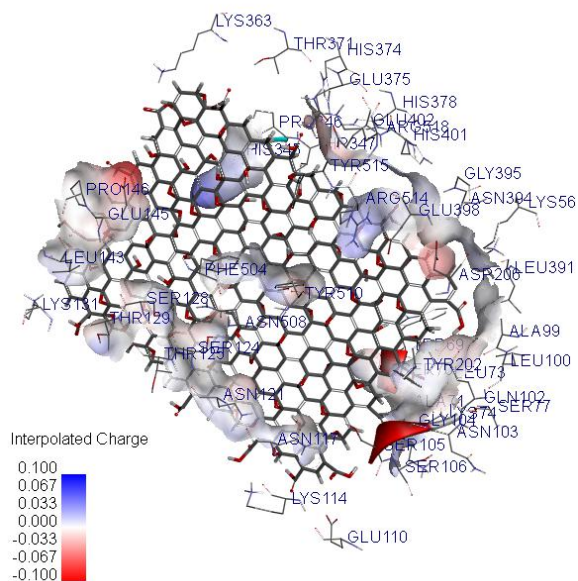

e

**Figure S6.** (a) GO-ACE2 docking result, binding affinity -9.4 kcal/mol; (b) 2D map of ACE2 amino acids bonding interactions with GO; (c) H-bonding: pink shows donors and green shows acceptors; (d) Hydrophobicity (Pi-Pi, T-shaped Alkyl) interaction; TYR510, PRO146; (e) Charge, GLU145.

**Table S8.** Bonding interactions of GO with ACE2.

| Donor-Acceptor          | Distance,<br>Å | Category      | Types*            | Angle,<br>DHA* | Angle,<br>HAY(Z,E)* |
|-------------------------|----------------|---------------|-------------------|----------------|---------------------|
| A:ASN121:HD21 - GO:O206 | 2.584          | H-bond        | HB                | 173.731        | 114.749             |
| A:SER124:HG - GO:O209   | 2.570          | H-bond        | HB                | 167.883        | 99.58               |
| A:SER124:HG - GO:O467   | 2.759          | H-bond        | HB                | 108.436        | 92.73               |
| A:SER128:HG - GO:O115   | 2.702          | H-bond        | HB                | 175.109        | 114.444             |
| A:SER128:HG - GO:O119   | 2.995          | H-bond        | HB                | 107.141        | 109.698             |
| A:HIS345:HE2 - GO:O296  | 2.487          | H-bond        | HB                | 133.804        | 107.151             |
| A:ASN394:HD21 - GO:O429 | 2.100          | H-bond        | HB                | 165.851        | 111.093             |
| A:ARG514:HH11 - GO:O17  | 2.985          | H-bond        | HB                | 118.787        | 141.188             |
| A:ARG514:HH21 - GO:O17  | 2.428          | H-bond        | HB                | 126.18         | 96.295              |
| A:PRO146:CD - GO:O117   | 3.682          | H-bond        | HB                |                |                     |
| A:PRO146:CD - GO:O511   | 3.492          | H-bond        | HB                |                |                     |
| A:HIS345:CD2 - GO:O477  | 2.978          | H-bond        | HB                |                |                     |
| A:GLU145:OE2 – GO       | 2.973          | Electrostatic | Pi-Anion          |                |                     |
| A:TYR510 – GO           | 5.821          | Hydrophobic   | Pi-Pi<br>T-shaped |                |                     |
| A:PRO146 - GO           | 5.119          | Hydrophobic   | Alkyl             |                |                     |

\*HB=conventional, CH=Carbon-Hydrogen; DHAY(Z,E)=donor-hydrogen-acceptor-any atom

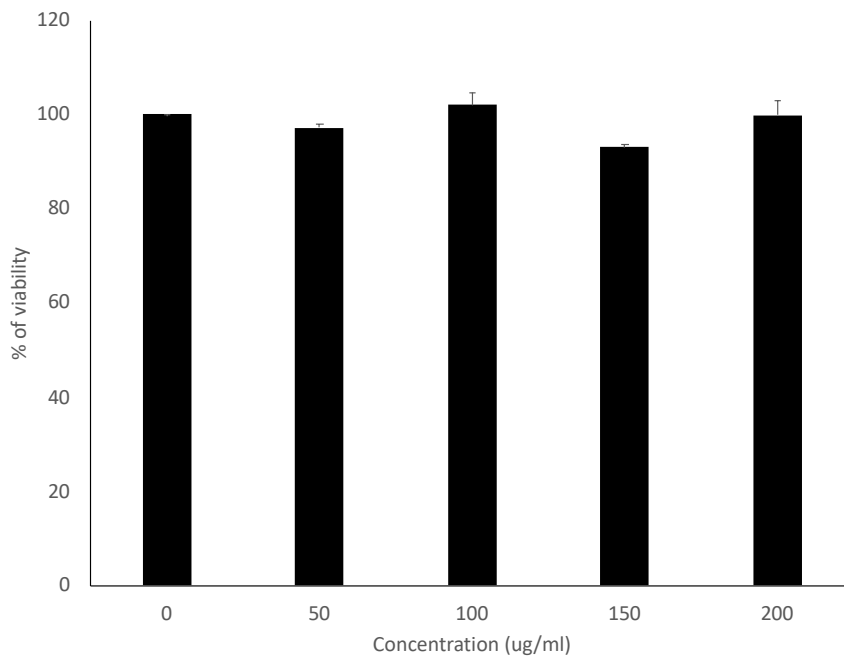

**Figure S7. Toxicity of GO in Vero E6 cells.** Vero E6 cells were treated with GO at different concentrations and viability of cells were assessed by modified LDH assay.

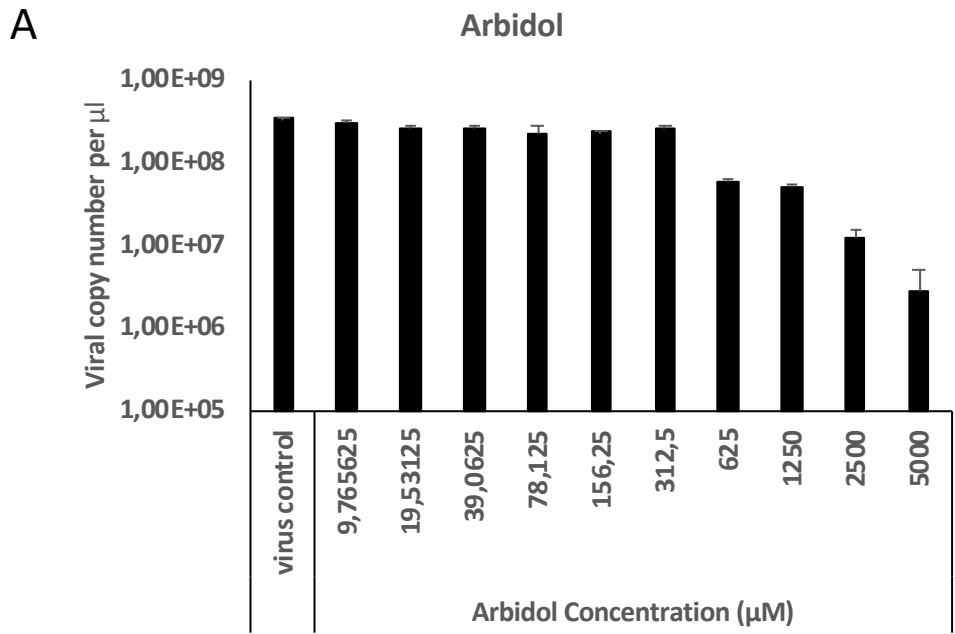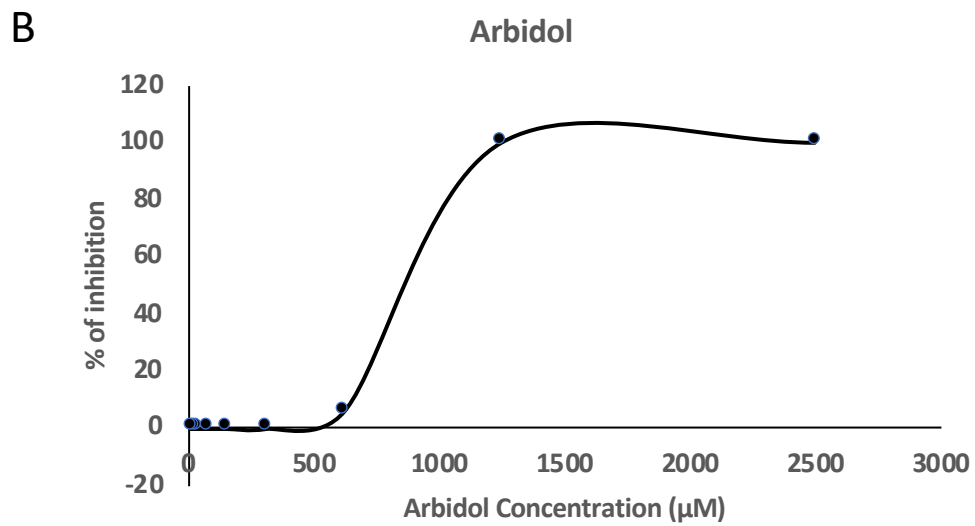

**Figure S8. Antiviral activity of the ‘benchmark’ drug Arbidol.** Vero E6 cells were pretreated with Arbidol at different dilutions, inhibition of viral infection was assessed via A) qRT-PCR and B) plaque assay.

**Table S9.** Mutations of 4 viral genotypes used in this study.

| <b>Genotypes</b>                                                                                                                                                                                                                                       | <b>GISAID Clade</b> |
|--------------------------------------------------------------------------------------------------------------------------------------------------------------------------------------------------------------------------------------------------------|---------------------|
| <b>EPI_ISL_437313 2020-03-27</b><br>Location,Mutation,Count<br>Turkey,Spike_D614G,1<br>Turkey,N_R203K,1<br>Turkey,N_G204R,1<br>Turkey,NSP12_P323L,1                                                                                                    | GR                  |
| <b>hCoV-19/Turkey/HSGM-1027/2020</b><br>EPI_ISL_437317 2020-03-27<br>Turkey,Spike_G1251V,1<br>Turkey,NS8_L84S,1<br>Turkey,N_S202N,1                                                                                                                    | S                   |
| <b>hCoV-19/Turkey/HSGM-1049/2020</b><br>EPI_ISL_437309 2020-03-26<br>Turkey,Spike_D614G,1<br>Turkey,NS3_Q57H,1<br>Turkey,NSP3_P395L,1<br>Turkey,NSP2_T85I,1<br>Turkey,NSP13_T127I,1<br>Turkey,NSP12_P323L,1                                            | GH                  |
| <b>hCoV-19/Turkey/HSGM-439/2020</b><br>EPI_ISL_437307 2020-03-25<br>Turkey,NSP2_T170I,1<br>Turkey,NSP11_A12V,1<br>Turkey,NSP6_L37F,1<br>Turkey,NSP4_S137L,1<br>Turkey,NSP13_A4V,1<br>Turkey,NSP2_V198I,1<br>Turkey,NSP5_L50F,1<br>Turkey,NSP3_F1161L,1 | Other               |
